# Supplementary material for: Strategic synthesis of mesoporous Pt-on-Pd bimetallic spheres templated from a polymeric micelle assembly
Source: Royal Society of Chemistry journal article supplement (doi:10.1039/c6ta02526a), 2016-01-01
Supplement: c6ta02526a1.pdf [file c6ta02526a1.pdf]

## Supporting Information

### Strategic Synthesis of Mesoporous Pt-on-Pd Bimetallic Spheres Templated from Polymeric Micelle Assembly

Yunqi Li<sup>[a,b]</sup>, Cuiling Li<sup>[a]</sup>, Bishnu Prasad Bastakoti<sup>[a]</sup>, Jing Tang<sup>[a,b]</sup>, Bo Jiang<sup>[a,b]</sup>,

Jeonghun Kim<sup>[c]</sup>, Mohammed Shahabuddin<sup>[d]</sup>, Yoshio Bando<sup>[a,b]</sup>,

Jung Ho Kim<sup>\*[c]</sup>, and Yusuke Yamauchi<sup>\*[a,b]</sup>

[a] World Premier International (WPI) Research Center for Materials Nanoarchitectonics (MANA), National Institute for Materials Science (NIMS), 1-1 Namiki, Tsukuba, Ibaraki 305-0044 (Japan)

[b] Faculty of Science and Engineering, Waseda University, 3-4-1 Okubo, Shinjuku, Tokyo 169-8555 (Japan)

[c] Institute for Superconducting and Electronic Materials, Australian Institute for Innovative Materials, University of Wollongong, Squires Way, North Wollongong, NSW 2500 (Australia)

[d] Department of Physics and Astronomy, College of Science, PO Box 2455, King Saud University, Riyadh 11451 (Saudi Arabia)

E-mails: [jhk@uow.edu.au](mailto:jhk@uow.edu.au); [yamauchi.yusuke@nims.go.jp](mailto:yamauchi.yusuke@nims.go.jp)

**Figure S1**

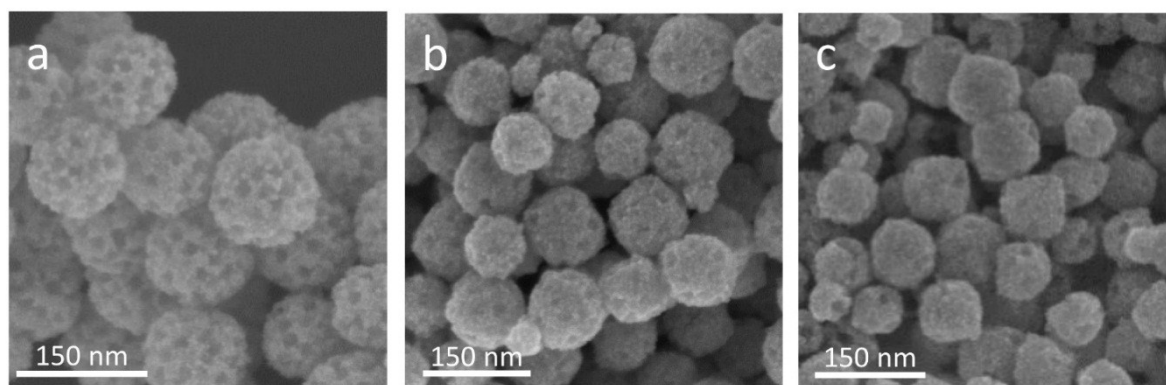

**Figure S1.** SEM images of mesoporous Pt-on-Pd spheres with different compositions of Pt/Pd = (a) 92/8, (b) 62/38, and (c) 42/58. These three samples were prepared from different precursor solutions of  $\text{PtCl}_4^{2-}/\text{PdCl}_4^{2-}$  = (a) 9 : 1, (b) 7 : 3, and (c) 5 : 5, respectively.

**Figure S2**

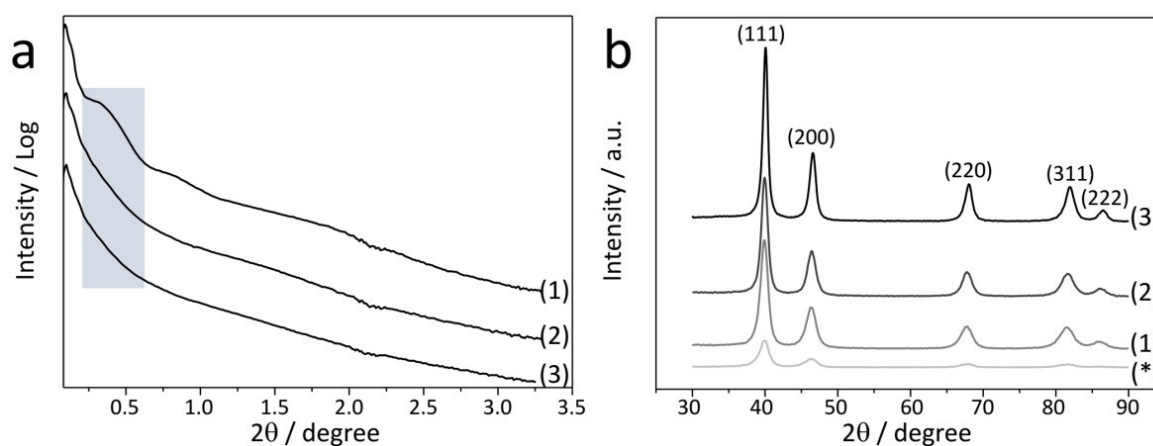

**Figure S2.** (a) Small-angle XRD patterns and (b) wide-angle XRD patterns of mesoporous Pt-on-Pd spheres with different compositions of Pt/Pd = (1) 92/8, (2) 62/38, and (3) 42/58. For comparison, the wide-angle XRD pattern of mesoporous Pt spheres is also shown as (\*).

**Table S1.** ICP-OES analysis of mesoporous Pt-on-Pd spheres.

| Molar ratio of $\text{PtCl}_4^{2-}/\text{PdCl}_4^{2-}$ | Compositions of Pt to Pd in mesoporous Pt-on-Pd spheres |
|--------------------------------------------------------|---------------------------------------------------------|
| 10 : 0                                                 | 100% : 0                                                |
| 9 : 1                                                  | 92% : 8%                                                |
| 7 : 3                                                  | 62% : 38%                                               |
| 5 : 5                                                  | 42% : 58%                                               |

**Figure S3**

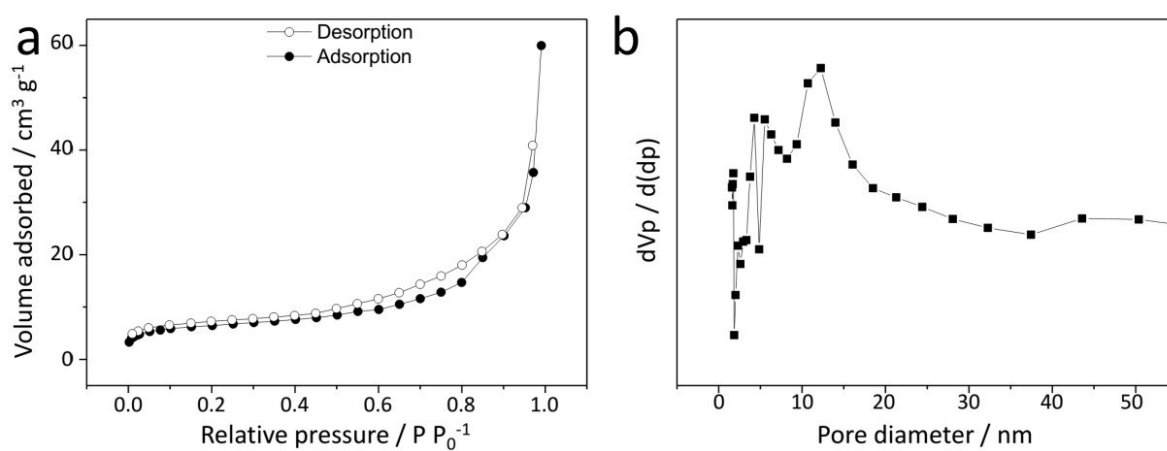

**Figure S3.** (a) N<sub>2</sub> adsorption-desorption isotherm and (b) BJH pore size distribution curve of mesoporous Pt-on-Pd spheres (Pt/Pd = 92/8) with a dominant pore size of 12 nm.

**Figure S4**

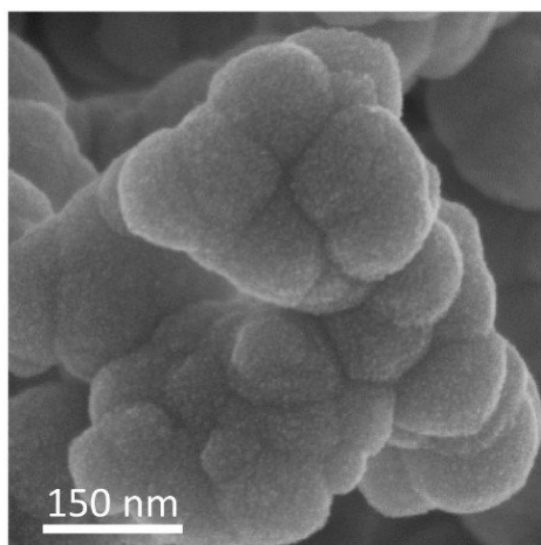

**Figure S4.** SEM image of corresponding Pt-on-Pd spheres synthesized without using triblock copolymer.

**Figure S5**

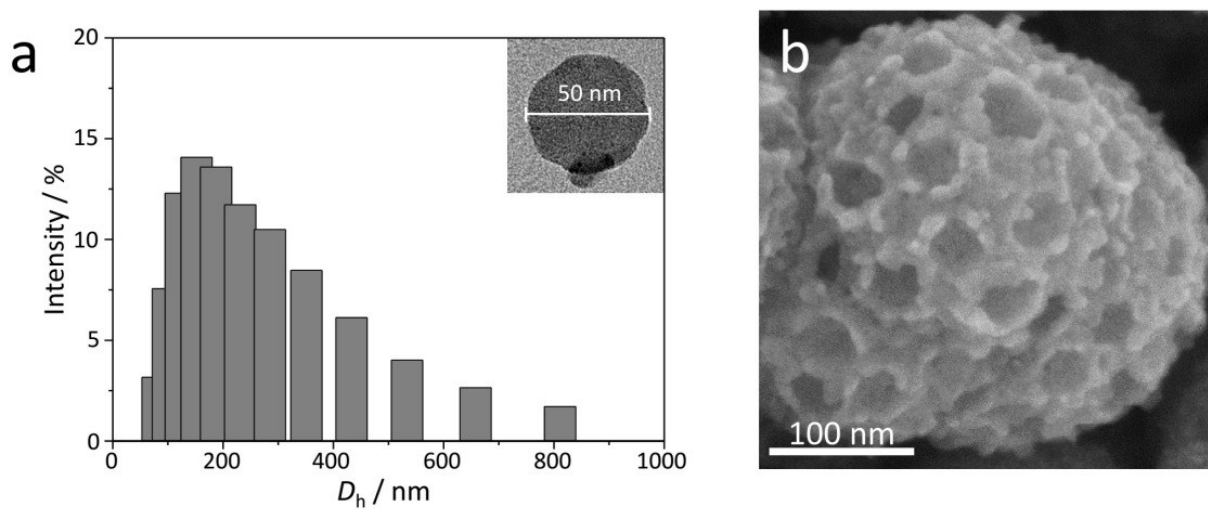

**Figure S5.** (a) Histogram of size distribution of swollen micelles (inset: TEM image of micelle with a swollen PS core ( $\sim 50$  nm), highlighted by 0.1 wt% phosphotungstic acid), and (b) SEM image of huge-sized mesoporous Pt-on-Pd particle obtained from swollen micelles.

**Figure S6**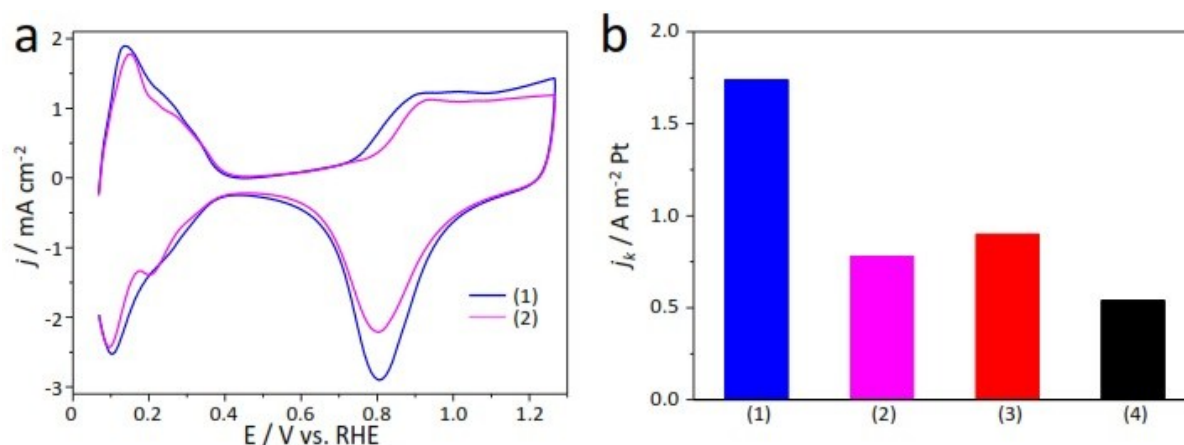

**Figure S6.** (a) CV curves of (1) mesoporous Pt-on-Pd spheres (Pt/Pd = 92/8), (2) mesoporous Pt, (3) PtC-20% catalyst, and (4) PtB in  $\text{N}_2$ -saturated 0.1 M  $\text{HClO}_4$  solution. The ECSAs of mesoporous Pt-on-Pd spheres, and mesoporous Pt spheres are calculated to be  $26.1 \text{ m}^2 \text{ g}_{\text{Pt}}^{-1}$ ,  $20.1 \text{ m}^2 \text{ g}_{\text{Pt}}^{-1}$ , respectively. (b) Comparison of the specific activities at 0.9 V (vs. RHE) normalized by the corresponding ECSAs.

**Table S2.** Comparison of catalytic activity of mesoporous Pt-on-Pd spheres towards ORR performance with other Pt-Pd based catalysts.

| Reference                                | Material                       | Onset potential (V vs. RHE) | Half-wave potential (V vs. RHE) | Scan rate ( $\text{mV s}^{-1}$ ) | Rotation rate (rpm) |
|------------------------------------------|--------------------------------|-----------------------------|---------------------------------|----------------------------------|---------------------|
| This project                             | Mesoporous Pt-on-Pd spheres    | 1.01                        | 0.90                            | 10                               | 1600                |
| J. Mater. Chem. A, 2, 2233-2239, 2014.   | Dendritic Pt-on-Pd             | 1.06                        | 0.87                            | 5                                | 1600                |
| J. Phys. Chem. C, 117, 9826-9834, 2013.  | Pt-Pd alloy nanoflowers        | 0.90                        | 0.84                            | 5                                | 1600                |
| Langmuir, 28, 1579-1587, 2012.           | Pt@PdCu/C core-shell structure | 0.98                        | 0.89                            | 5                                | 1600                |
| Electrochimica Acta, 152, 417-424, 2015. | Nanoporous PtPd alloy          | 1.0                         | 0.90                            | 10                               | 1600                |
| Nano Lett., 14, 3570-3576, 2014.         | Pt layers on Pd nanocubes      | 0.85                        | 0.93                            | -                                | 1600                |
| J. Am. Chem. Soc., 137, 15036-15042.     | Pd@Pd decahedra on carbon      | 0.98                        | 0.92                            | 10                               | 1600                |

**Figure S7**

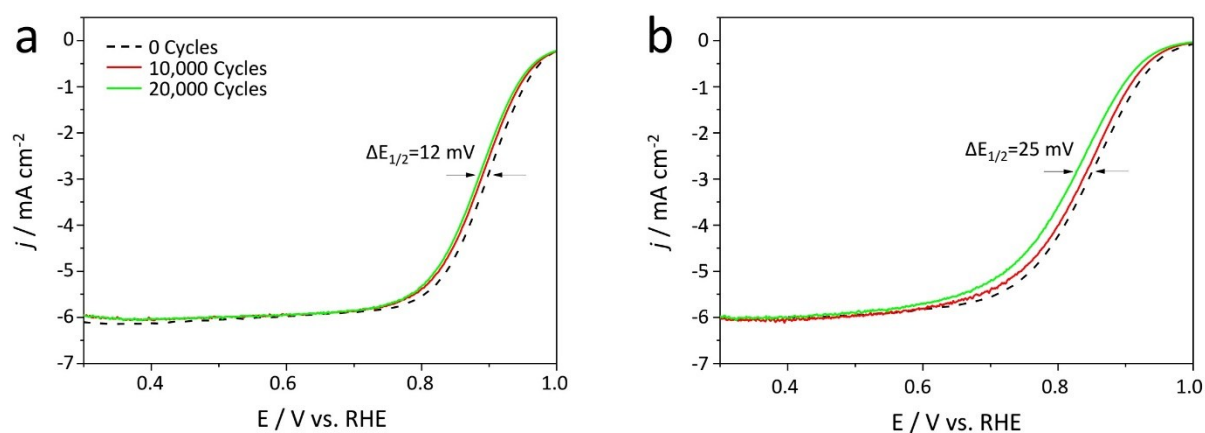

**Figure S7.** ORR polarization curves obtained in  $\text{O}_2$ -saturated 0.1 M  $\text{HClO}_4$  solution at 1,600 rpm after 0, 10000, and 20000 cycles between 0.068 V and 1.268 V (vs. RHE) for (a) mesoporous Pt-on-Pd spheres (Pt/Pd = 92/8) and (b) PtC-20% catalyst.

**Figure S8**

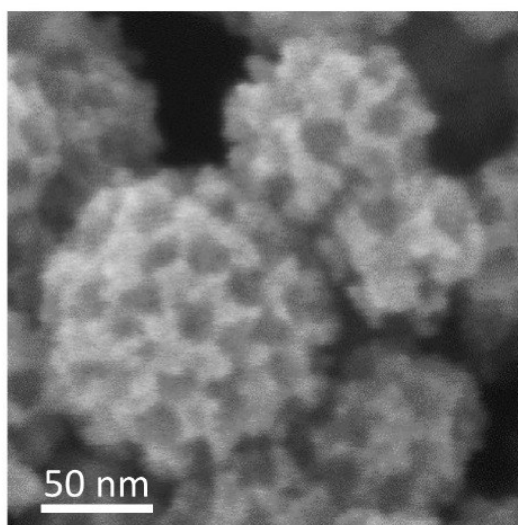

**Figure S8.** SEM image of mesoporous Pt-on-Pd spheres (Pt/Pd = 92/8) after 20000 potential cycles between 0.068 V and 1.268 V (vs. RHE) in  $\text{O}_2$ -saturated 0.1 M  $\text{HClO}_4$  solution.
